# Supplementary material
Source: publisher figshare collection journal article supplement (https://acs.figshare.com/ndownloader/files/4545208)

## Supporting Information

### New Scalarane-Based Sesterterpenoid RCE-Protease Inhibitors Isolated from the Indonesian Marine Sponge *Carteriospongia foliascens*

David E. Williams, Irwin Hollander, Larry Feldberg, Eileen Frommer, Robert Mallon, Akbar Tahir, Rob van Soest, and Raymond J. Andersen\*

*Departments of Chemistry and Earth & Ocean Sciences, University of British Columbia, Vancouver, B.C., Canada, V6T 1Z1, Oncology and Immunology Division, Building 200/4219A, Wyeth Research, 401 North Middletown Road, Pearl River, NY 10965, USA, Department of Marine Science, University of Hasanuddin, Ujung Padang, Indonesia, 90245, and Department of Coelenterates and Porifera (Zoologisch Museum), University of Amsterdam, P.O. Box 94766, 1090 AT, Amsterdam, The Netherlands*

#### Index

- Page SI2:  $^1\text{H}$  NMR spectrum of **1** recorded at 600 MHz in  $\text{CDCl}_3$ .  
Page SI3: gHSQC spectrum of **1** recorded at 600 MHz in  $\text{CDCl}_3$ .  
Page SI4: gHMBC spectrum of **1** recorded at 600 MHz in  $\text{CDCl}_3$ .  
Page SI5:  $^1\text{H}$  NMR spectrum of **2** recorded at 600 MHz in  $\text{CDCl}_3$ .  
Page SI6: gHSQC spectrum of **2** recorded at 600 MHz in  $\text{CDCl}_3$ .  
Page SI7: gHMBC spectrum of **2** recorded at 600 MHz in  $\text{CDCl}_3$ .  
Page SI8:  $^1\text{H}$  NMR spectrum of the mixture of **3/4** recorded at 600 MHz in  $\text{CDCl}_3$ .  
Page SI9:  $^{13}\text{C}$  NMR spectrum of the mixture of **3/4** recorded at 150 MHz in  $\text{CDCl}_3$ .

$^1\text{H}$  NMR spectrum of **1** recorded at 600 MHz in  $\text{CDCl}_3$ .

600 MHz  $^1\text{H}$  NMR Spectrum of Compound **1** in  $\text{CDCl}_3$

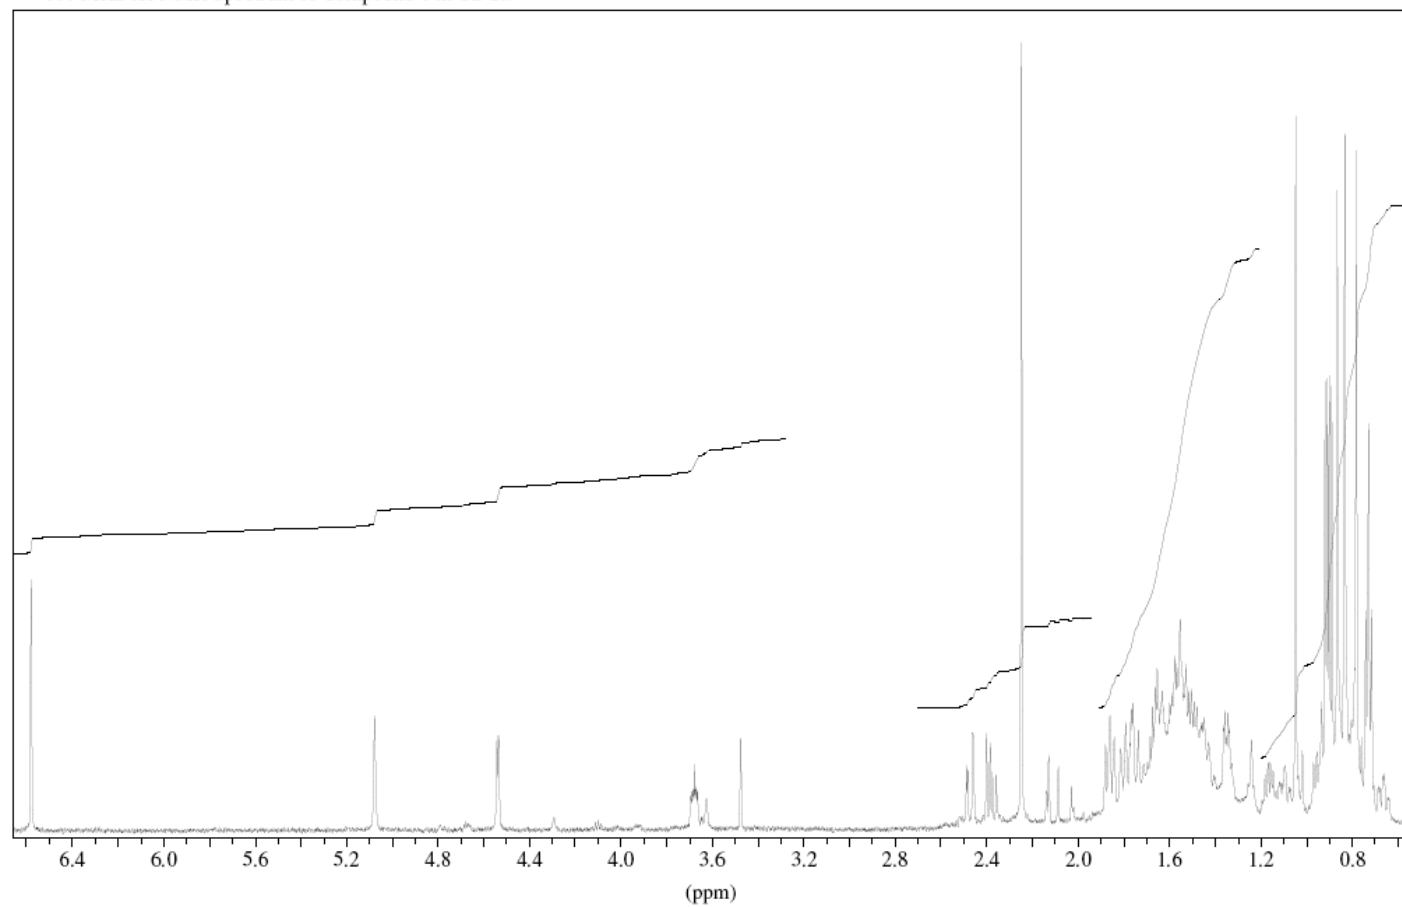

gHSQC spectrum of **1** recorded at 600 MHz in CDCl<sub>3</sub>.

gradHSQC Spectrum of Compound 1 Recorded at 600 MHz in CDCl<sub>3</sub>

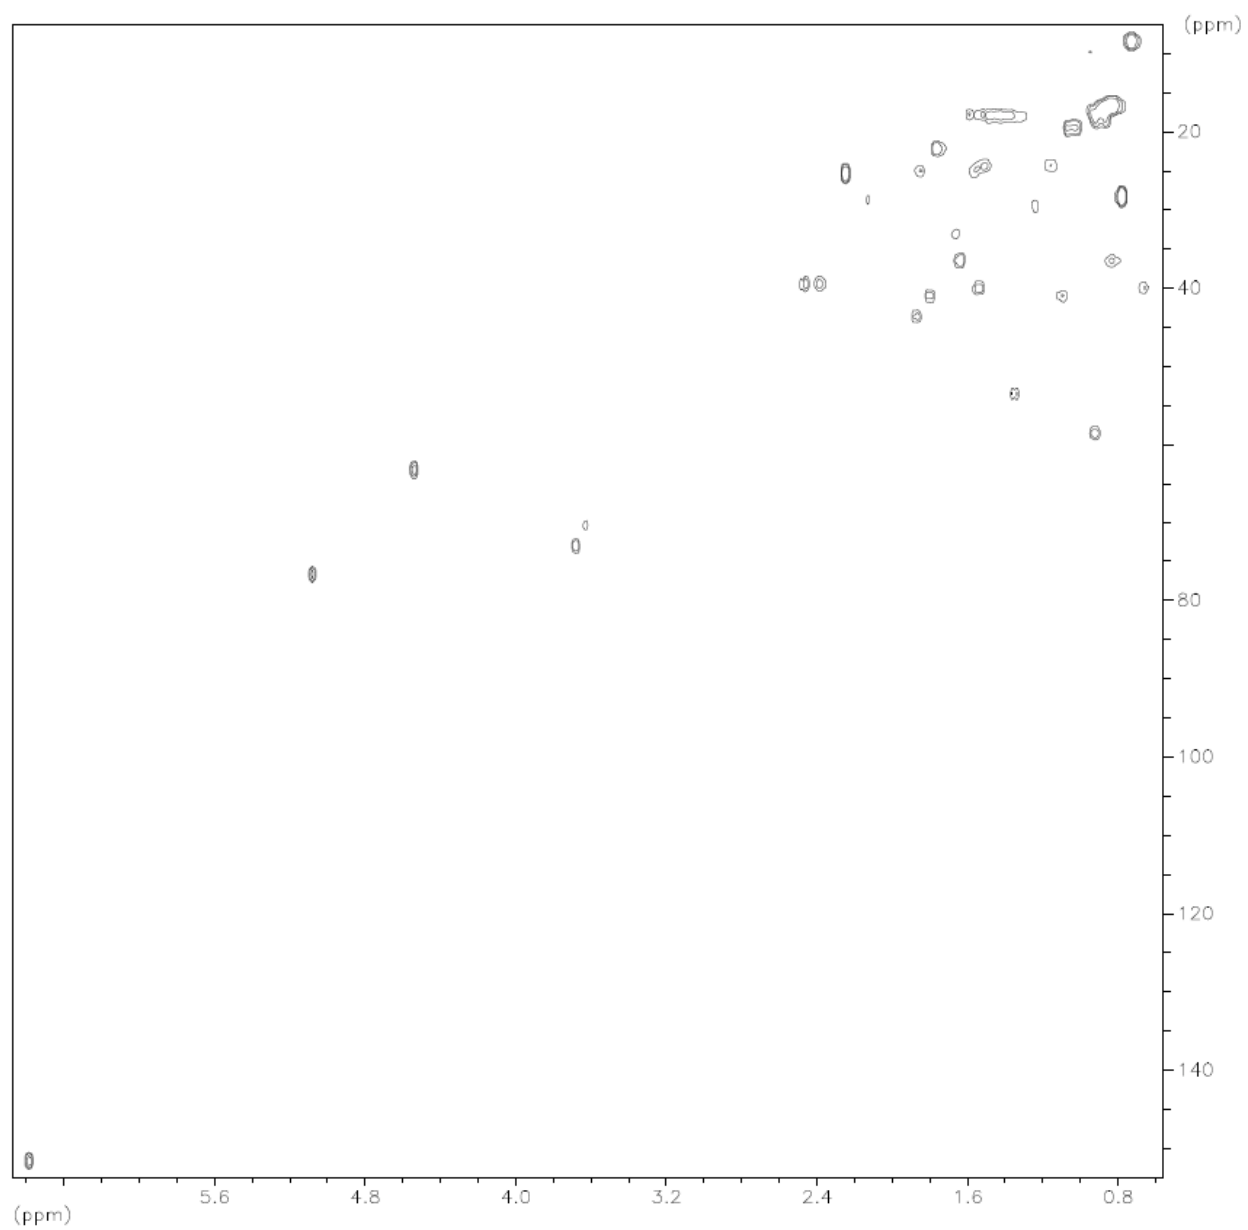

SI4

gHMBC spectrum of **1** recorded at 600 MHz in CDCl<sub>3</sub>.

gradHMBC Spectrum of Compound 1 Recorded at 600 MHz in CDCl<sub>3</sub>

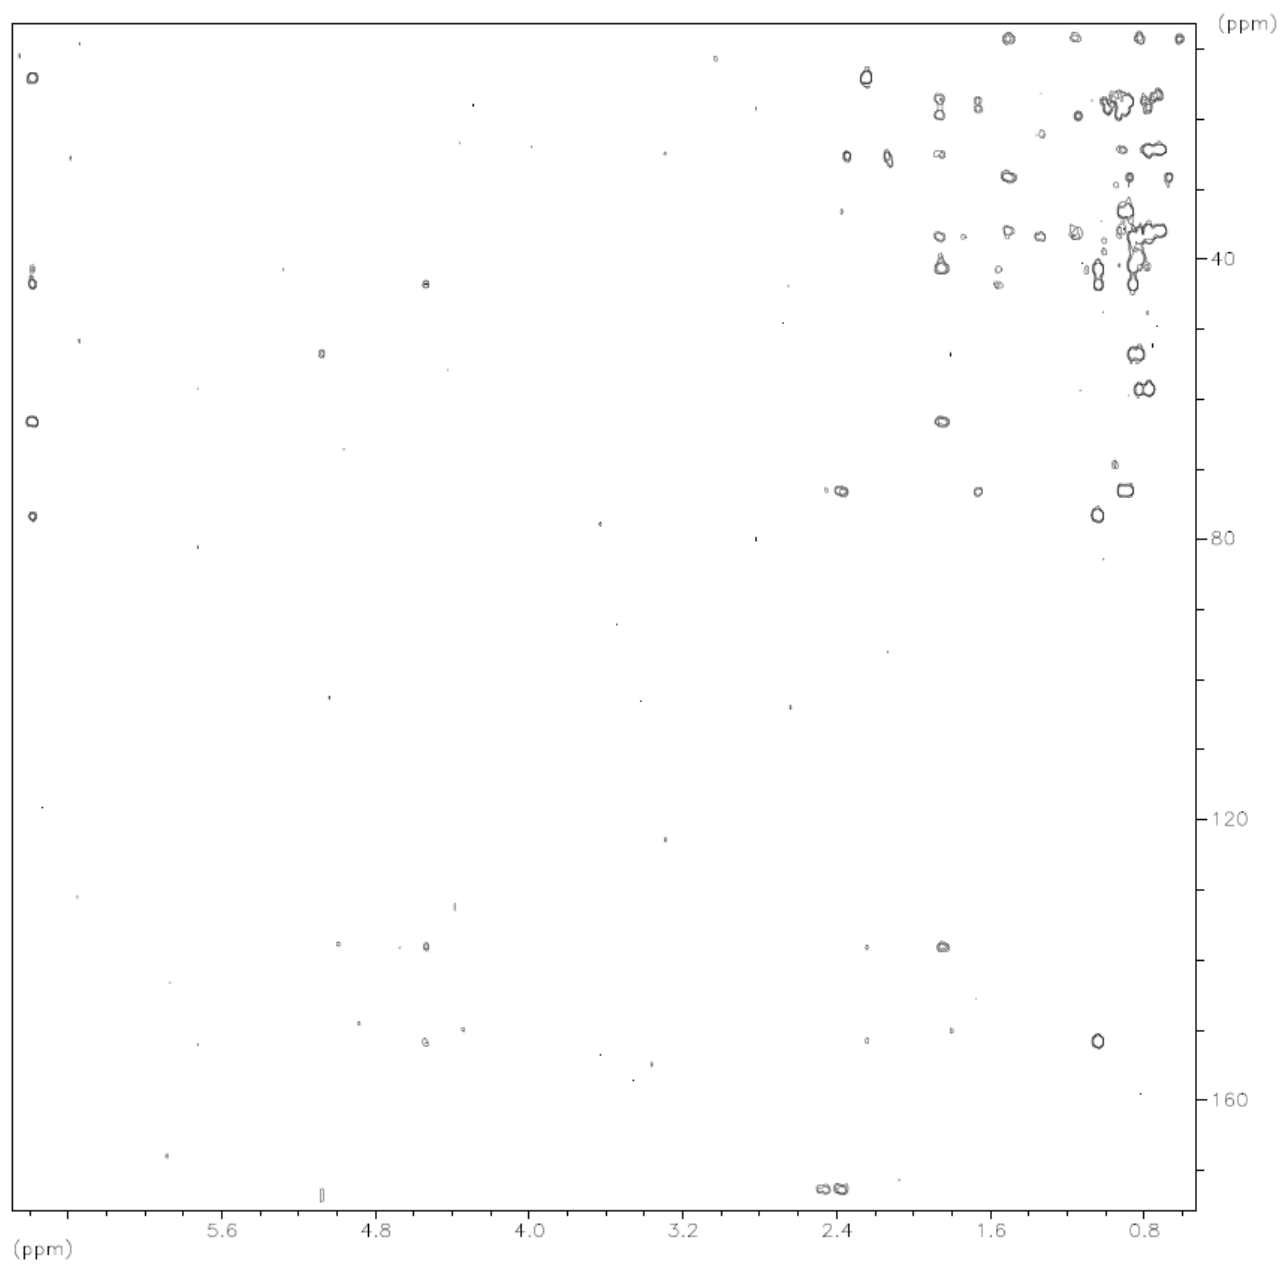

$^1\text{H}$  NMR spectrum of **2** recorded at 600 MHz in  $\text{CDCl}_3$ .

600 MHz  $^1\text{H}$  NMR Spectrum of Compound 2 in  $\text{CDCl}_3$

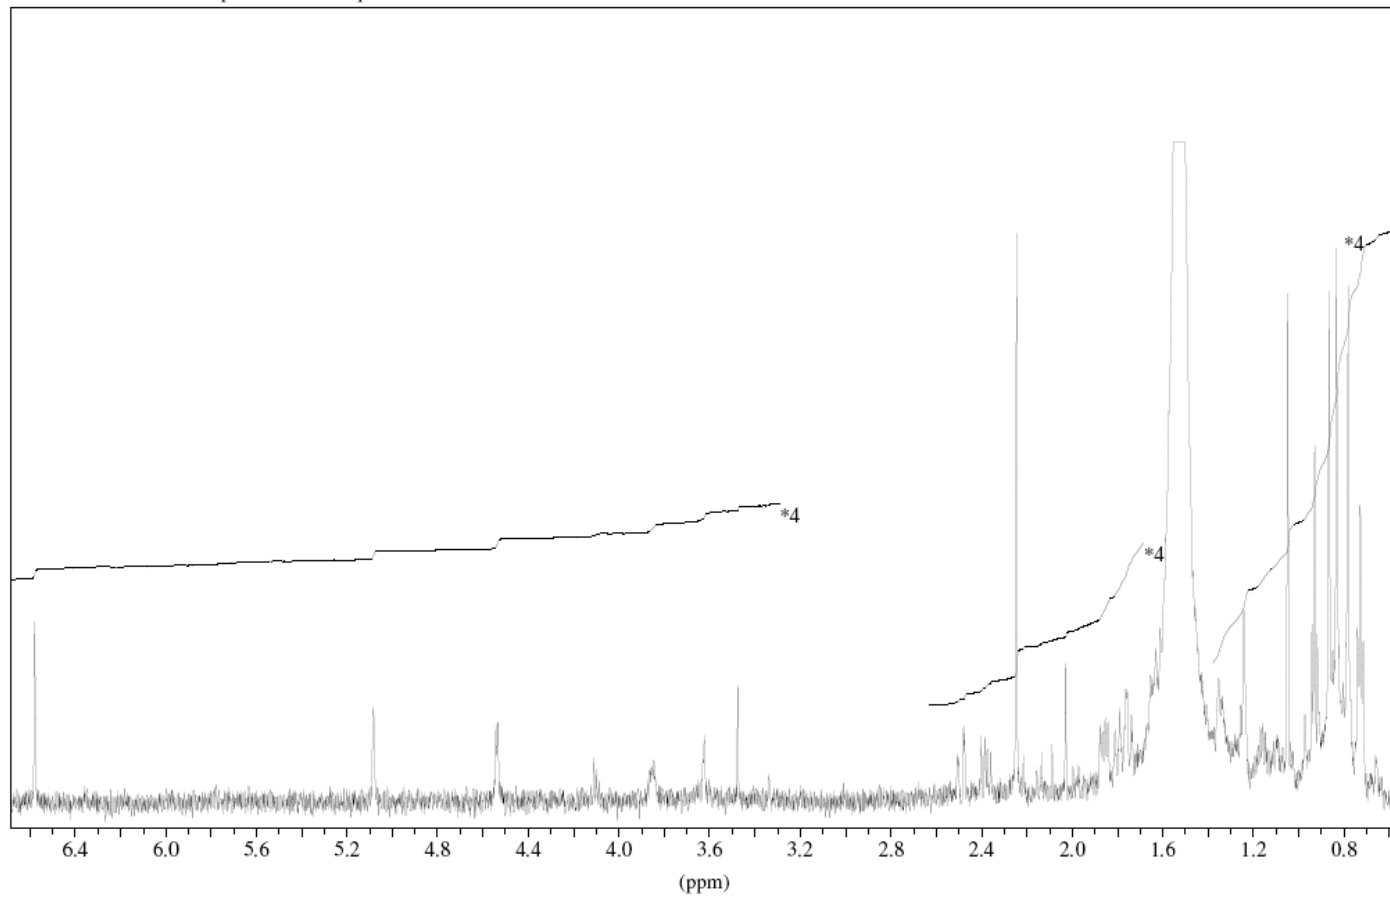

gHSQC spectrum of **2** recorded at 600 MHz in CDCl<sub>3</sub>.

gradHSQC Spectrum of Compound 2 Recorded at 600 MHz in CDCl<sub>3</sub>

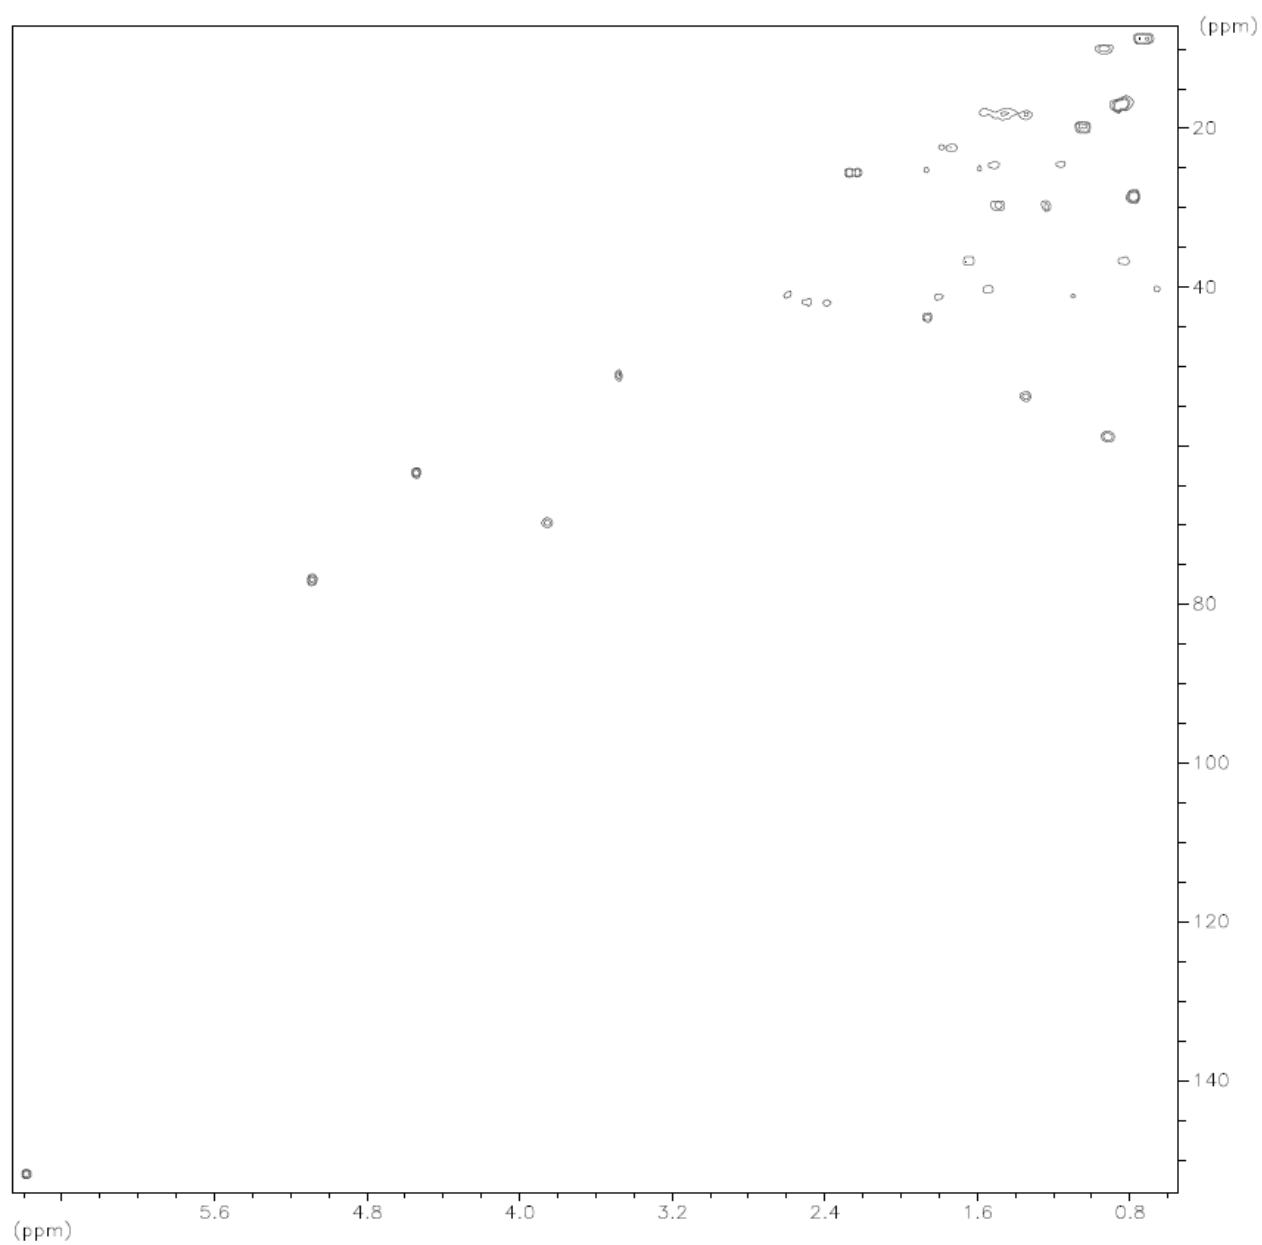

SI7

gHMBC spectrum of **2** recorded at 600 MHz in CDCl<sub>3</sub>.

gradHMBC Spectrum of Compound 2 Recorded at 600 MHz in CDCl<sub>3</sub>

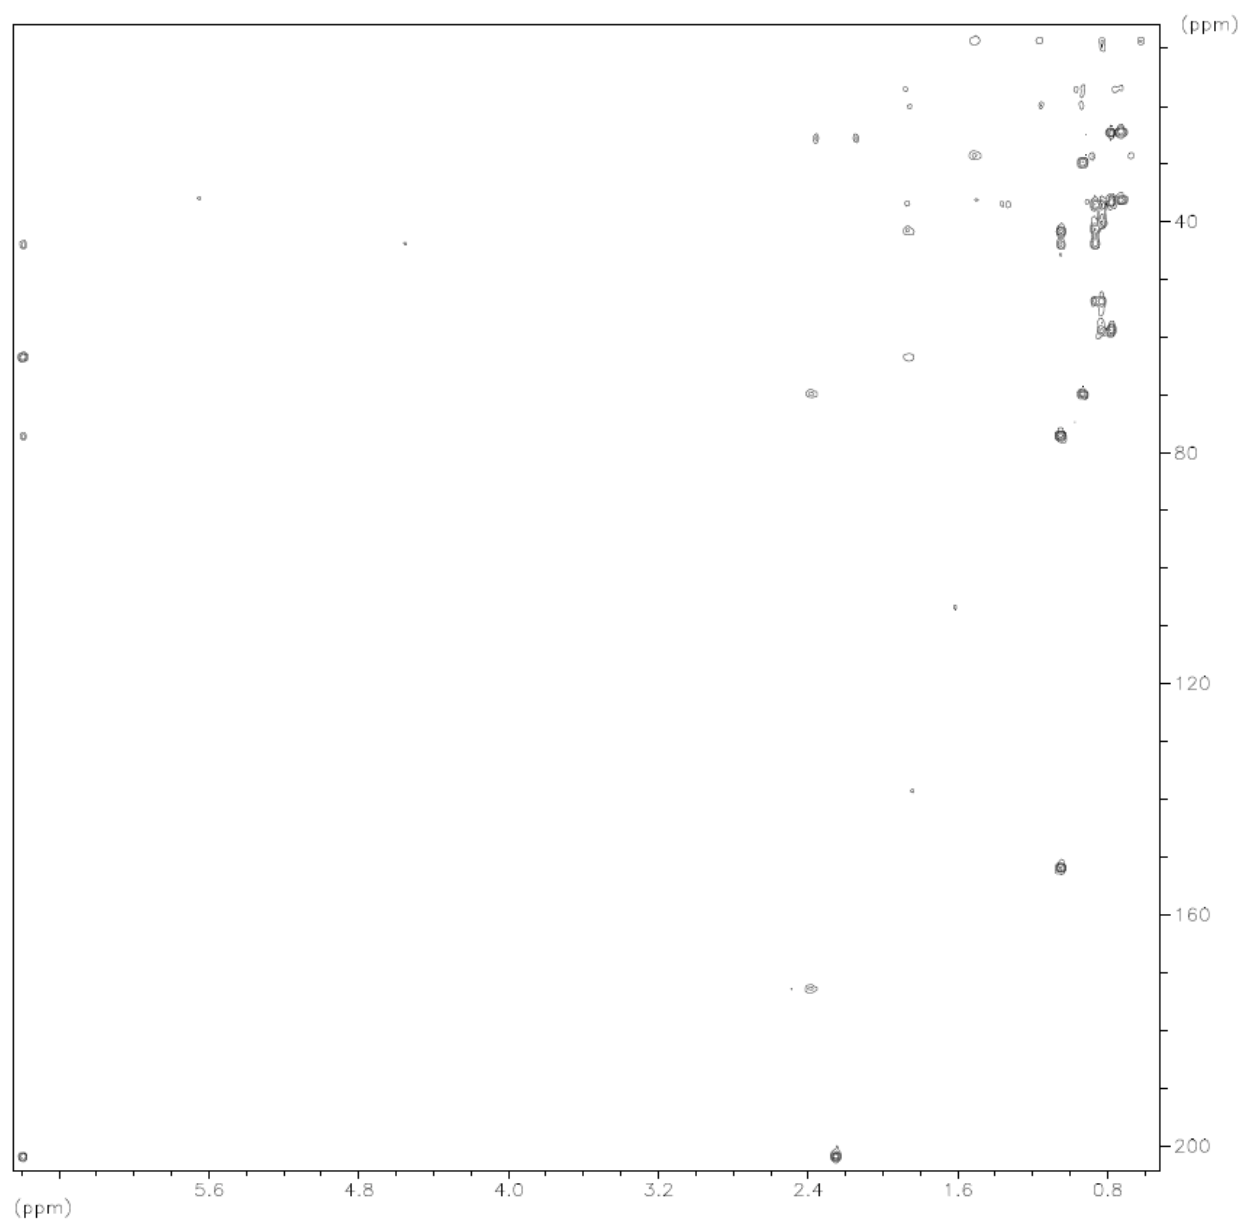

$^1\text{H}$  NMR spectrum of the mixture of **3/4** recorded at 600 MHz in  $\text{CDCl}_3$ .

600 MHz  $^1\text{H}$  NMR Spectrum of Compounds **3** & **4** in  $\text{CDCl}_3$

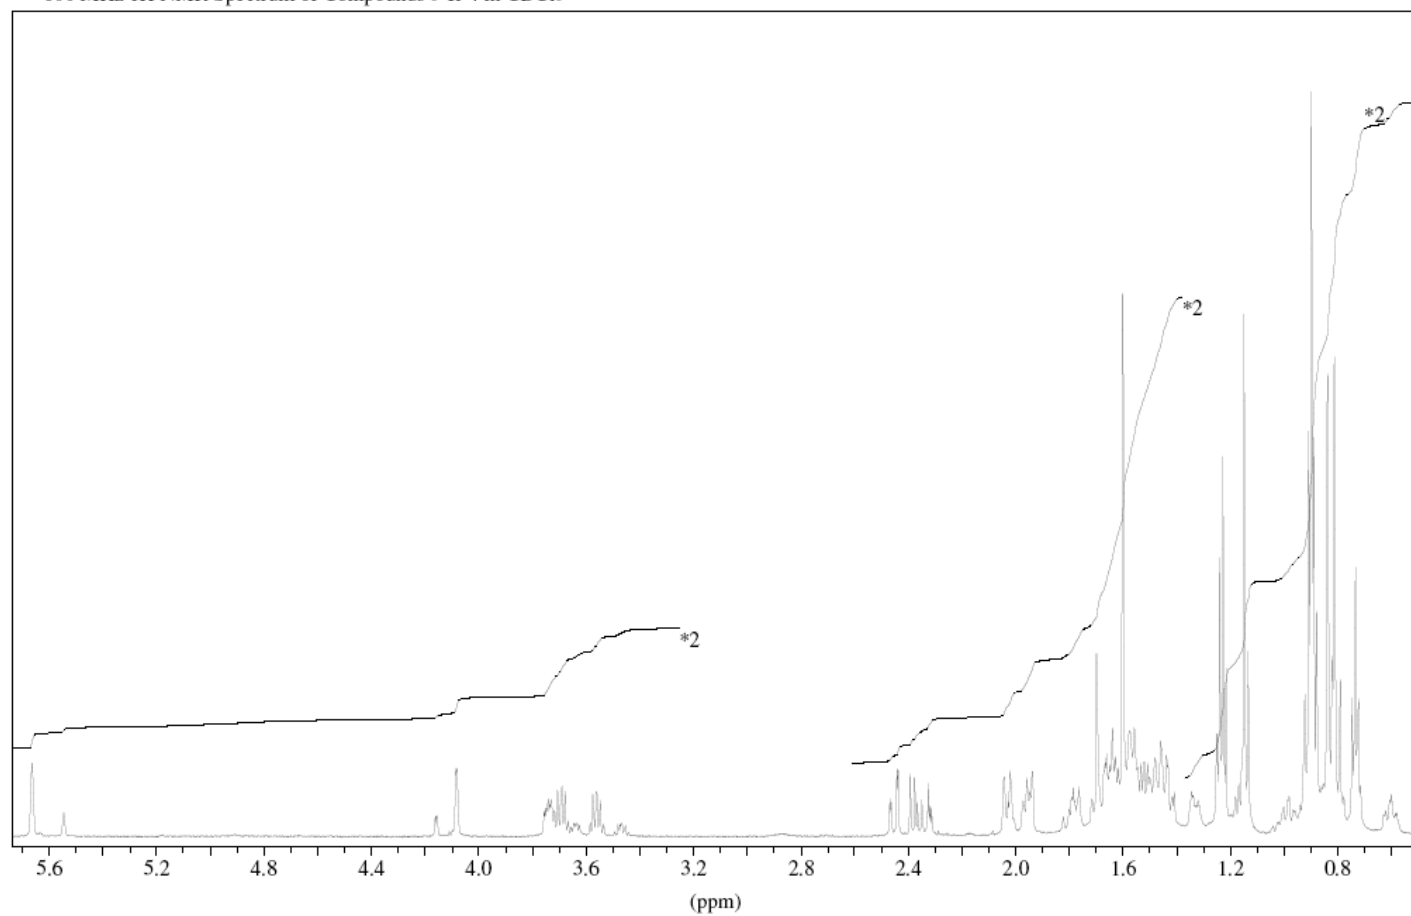



$^{13}\text{C}$  NMR spectrum of the mixture of **3/4** recorded at 150 MHz in  $\text{CDCl}_3$  (Note: the broad hump at  $\approx 110$  ppm is background noise from the cryoprobe)

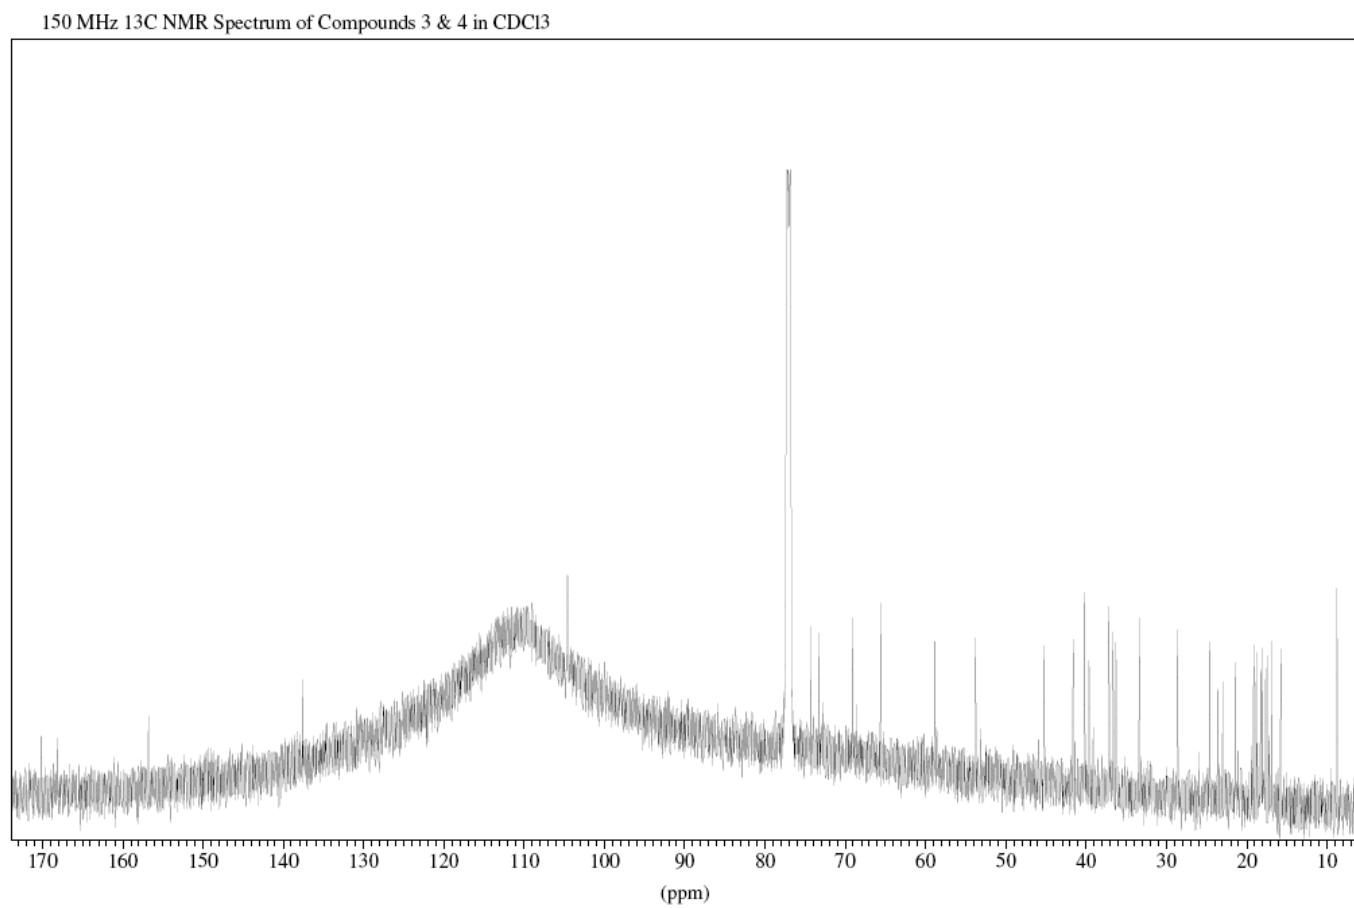

Supplement: Supplementary file 1 [file 4545208]
